# Supplementary material
Source: publisher figshare collection journal article supplement (https://frontiersin.figshare.com/ndownloader/files/21928674)

Figure S1

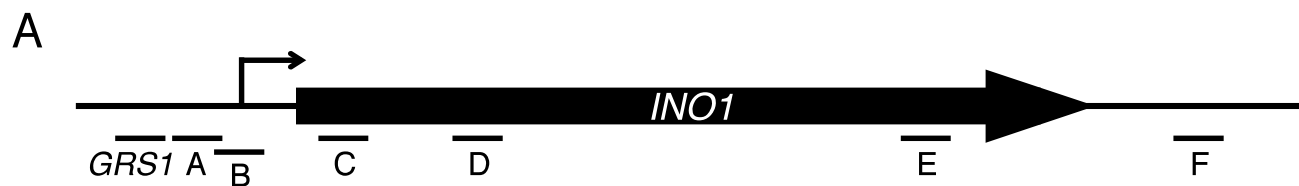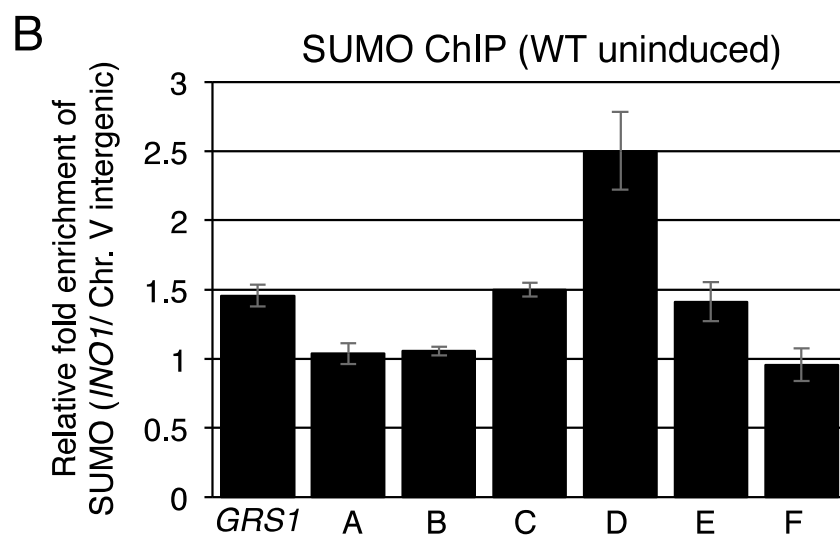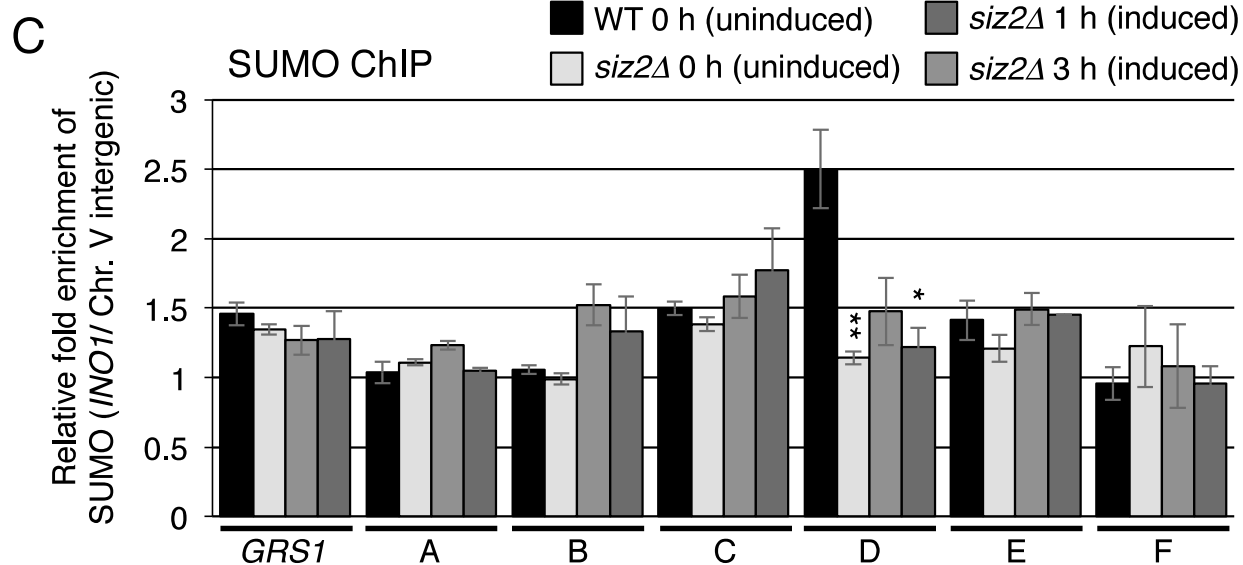

Supplement: Supplementary file [file 21928674]
